# Supplementary material for: Transformation of Glass Fiber Waste into Mesoporous Zeolite-Like Nanomaterials with Efficient Adsorption of Methylene Blue
Source: MDPI journal article supplement (doi:10.3390/su13116207), 2021-05-31
Supplement: s1 [file s1]

## Supplementary data

# Transformation of Glass Fiber Waste into Mesoporous Zeolite-Like Nanomaterials with Efficient Adsorption of Methylene Blue

Cheng-Kuo Tsai <sup>1,2,\*</sup> and Jao-Jia Horng <sup>1,2</sup>

<sup>1</sup> Department of Safety Health and Environmental Engineering, National Yunlin University of Science and Technology, Yunlin 64002, Taiwan; horngjj@gmail.com

<sup>2</sup> Emergency Toxic Response Information Center, National Yunlin University of Science and Technology, Yunlin 64002, Taiwan

\* Correspondence: yuntech.edu.tw; Tel.: +886-5-5342601 (ext. 4491)

**Table S1.** Experimental parameters and three levels.

| Factor | Description                     | Unit  | Level 1 | Level 2 | Level 3 |
|--------|---------------------------------|-------|---------|---------|---------|
| A      | GFW with activating agent ratio | (w/w) | 1: 2.5  | 1: 5    | 1: 10   |
| B      | Activating agent Conc.          | M     | 1       | 2.5     | 5       |
| C      | Hydrothermal Temp.              | K     | 393     | 423     | 453     |
| D      | Hydrothermal Time               | Hour  | 8       | 16      | 24      |

**Table S2.** Fabrication of MZN material orthogonal L9 array for MB sorption.

| Exp. no | Factors |   |   |   |
|---------|---------|---|---|---|
|         | A       | B | C | D |
| 1       | 1       | 1 | 1 | 1 |
| 2       | 1       | 2 | 2 | 2 |
| 3       | 1       | 3 | 3 | 3 |
| 4       | 2       | 1 | 2 | 3 |
| 5       | 2       | 2 | 3 | 1 |
| 6       | 2       | 3 | 1 | 2 |
| 7       | 3       | 1 | 3 | 2 |
| 8       | 3       | 2 | 1 | 3 |
| 9       | 3       | 3 | 2 | 1 |

**Table S3.** Ten-time validation experiments of the optimization procedure.

| Number  | Adsorption Capacity (mg/g) |
|---------|----------------------------|
| 1       | 123.0                      |
| 2       | 122.8                      |
| 3       | 121.9                      |
| 4       | 119.5                      |
| 5       | 118.2                      |
| 6       | 120.8                      |
| 7       | 119.6                      |
| 8       | 116.9                      |
| 9       | 118.0                      |
| 10      | 121.5                      |
| Average | 120.2                      |

STDEV

2.1

**Table S4.** Compositions of dominant constituents in GFW and MZN.

| Metal Oxide (wt.%)                                | GFW   | MZN  |
|---------------------------------------------------|-------|------|
| SiO <sub>2</sub>                                  | 69.8  | 58.4 |
| Al <sub>2</sub> O <sub>3</sub>                    | 13.1  | 15.3 |
| CaO                                               | 15.7  | 17.0 |
| MgO                                               | 0.64  | 1.14 |
| Na <sub>2</sub> O                                 | <0.01 | 6.80 |
| SiO <sub>2</sub> / Al <sub>2</sub> O <sub>3</sub> | 5.37  | 3.81 |

Note. Compositions of dominant constituents followed by ASTM C169-16 method

**Table S5.** The surface area, pore volume and pore size of the glass fiber waste before (GFW) and after (MZN) the activation process.

|                                                    | GFW   | MZN   |
|----------------------------------------------------|-------|-------|
| <b>Surface area (m<sup>2</sup> g<sup>-1</sup>)</b> |       |       |
| BET surface area                                   | 11.2  | 166   |
| t-Plot micropore area                              | 0.20  | 43.4  |
| <b>Pore Volume (cm<sup>3</sup> g<sup>-1</sup>)</b> |       |       |
| Single point adsorption total pore volume of pores | 0.046 | 0.234 |
| BJH Desorption cumulative volume of pores          | 0.046 | 0.222 |
| <b>Pore size (nm)</b>                              |       |       |
| BJH adsorption average pore diameter               | 24.2  | 7.3   |
| BJH desorption average pore diameter               | 16.4  | 6.6   |

**Table S6.** Isotherm parameters of MB adsorption onto the MZN material.

| Langmuir Isothermal Model       |                             |                | Freundlich Isothermal Model |     |                |
|---------------------------------|-----------------------------|----------------|-----------------------------|-----|----------------|
| $q_{max}$ (mg g <sup>-1</sup> ) | $k_L$ (L mg <sup>-1</sup> ) | R <sup>2</sup> | $K_f$                       | n   | R <sup>2</sup> |
| 132.0                           | 0.35                        | 0.996          | 42.6                        | 3.5 | 0.901          |

**Table S7.** Thermodynamic parameters for the adsorption of MB on MZN.

| T(K) | K <sub>c</sub> | ΔG (KJ·mol <sup>-1</sup> ) | ΔH(KJ·mol <sup>-1</sup> ) | ΔS (J·(mol K) <sup>-1</sup> ) |
|------|----------------|----------------------------|---------------------------|-------------------------------|
| 288  | 1982000        | −34.7                      |                           |                               |
| 298  | 1506000        | −35.2                      | −25.9                     | 31.0                          |
| 308  | 1056000        | −35.5                      |                           |                               |
| 318  | 716000         | −35.6                      |                           |                               |

$K_c$  values calculated from  $K_c = 10^6 \times K_L$ ,  $K_L$  (L mg<sup>-1</sup>) is the Langmuir constant related to the affinity between an adsorbent and adsorbate [1]

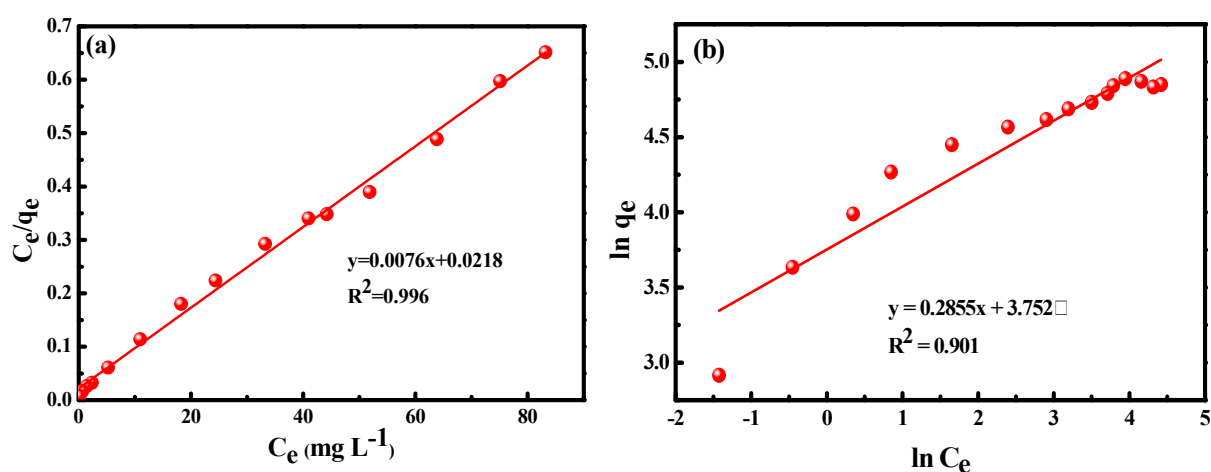

Figure S1. (a) Langmuir and (b) Freundlich adsorption isotherms of MB onto MZN.

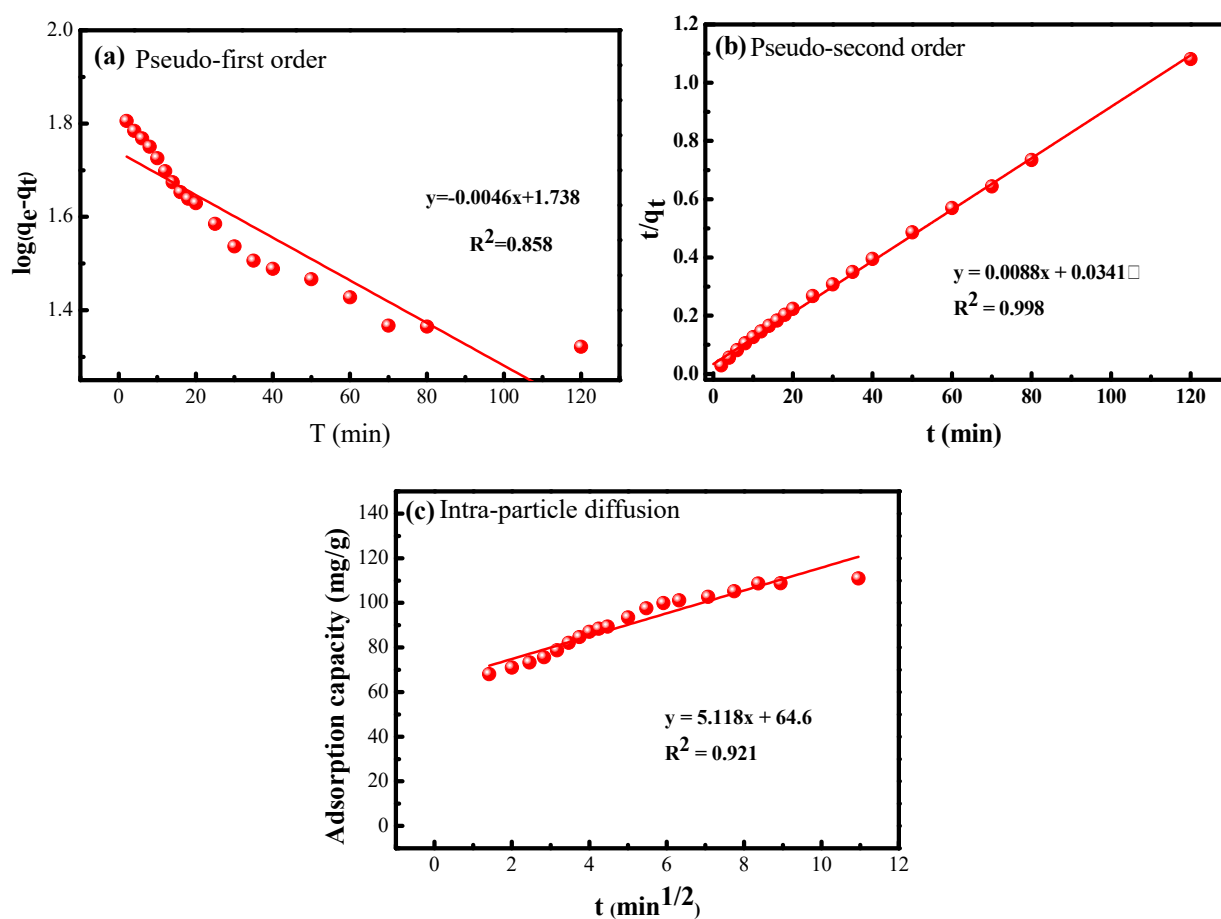

Figure S2. The (a) pseudo-first-order, (b) pseudo-second-order kinetics and (c) intra-particle diffusion model of adsorption of MB onto MZN nano-adsorbent.

#### Reference:

1. Tran, H.N.; You, S.-J.; Chao, H.-P. Thermodynamic parameters of cadmium adsorption onto orange peel calculated from various methods: A comparison study. *J. Env. Chem. Eng.* **2016**, *4*, 2671–2682.
